# Supplementary material for: Steroidogenesis and androgen/estrogen signaling pathways are altered in in vitro matured testicular tissues of prepubertal mice
Source: PubMed Central journal article supplement (PMC10721218; doi:10.7554/elife.85562), 2023-12-14

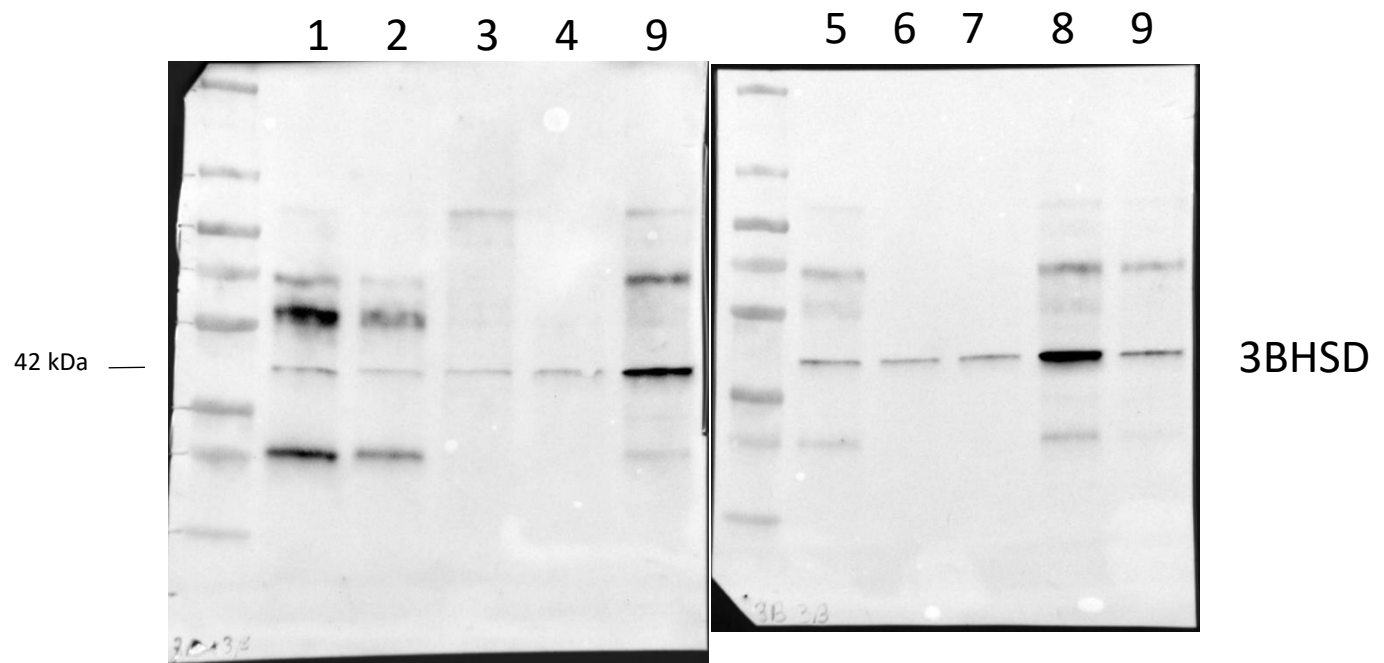

- 1 6 dpp
- 2 6 dpp CSF
- 3 D16 FT
- 4 D16 CSF
- 5 22 dpp
- 6 D30 FT
- 7 D30 CSF
- 8 36 dpp
- 9 Control

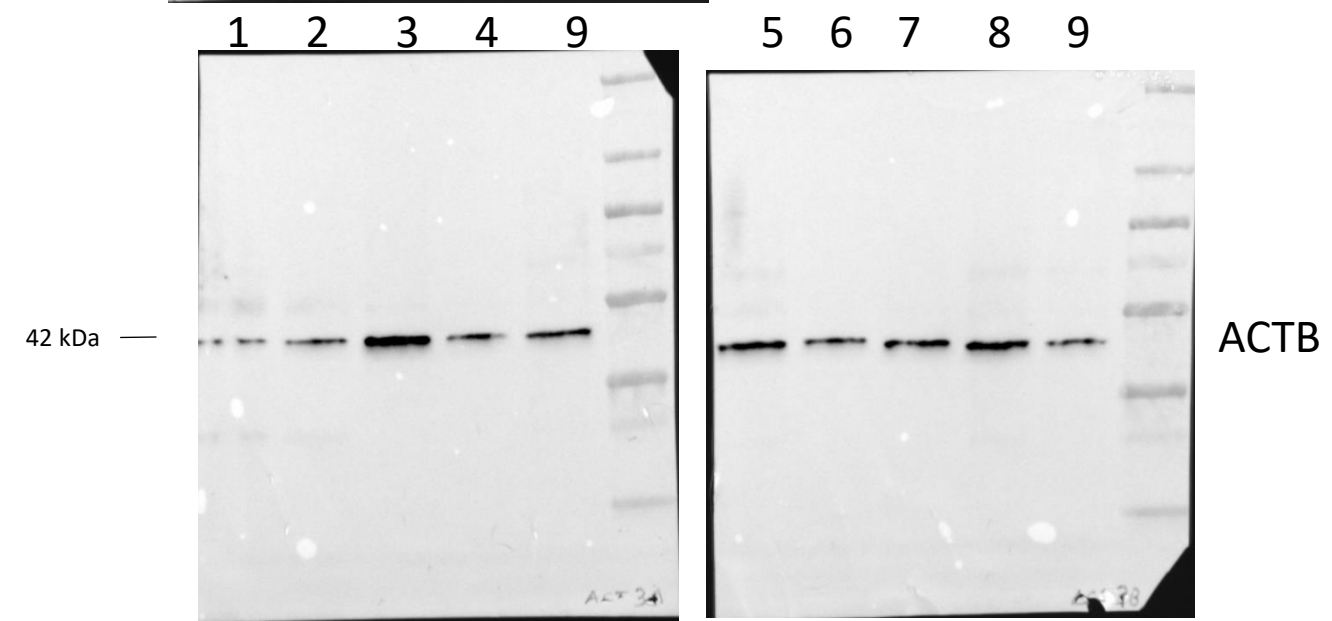

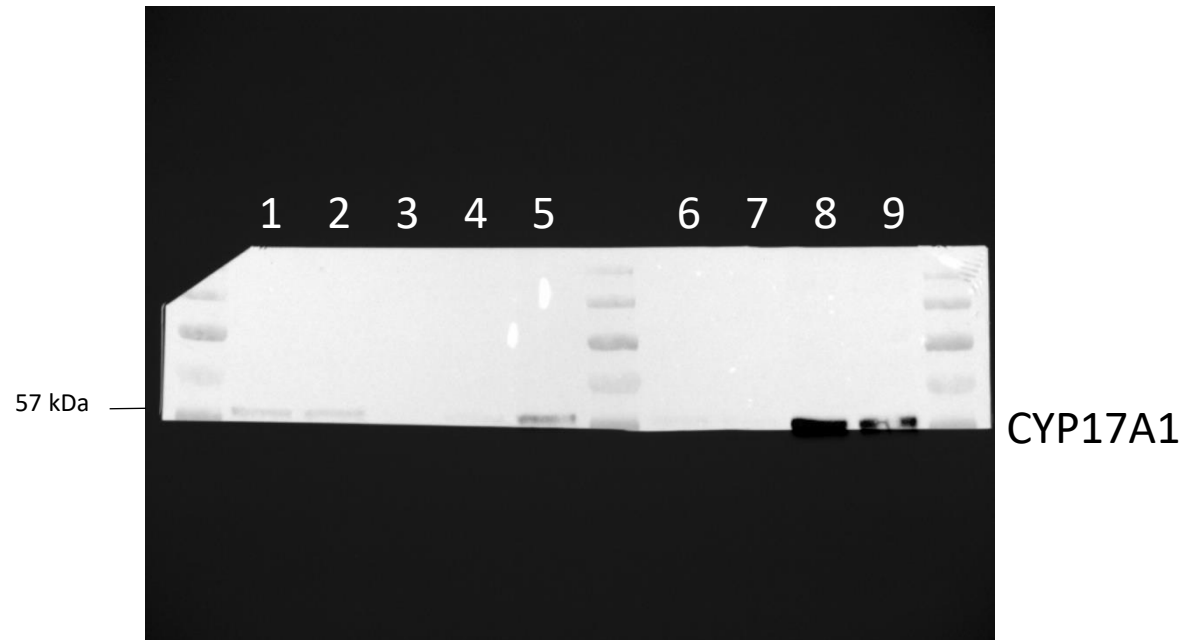

- 1 6 *dpp*
- 2 6 *dpp* CSF
- 3 D16 FT
- 4 D16 CSF
- 5 22 *dpp*
- 6 D30 FT
- 7 D30 CSF
- 8 36 *dpp*
- 9 Control

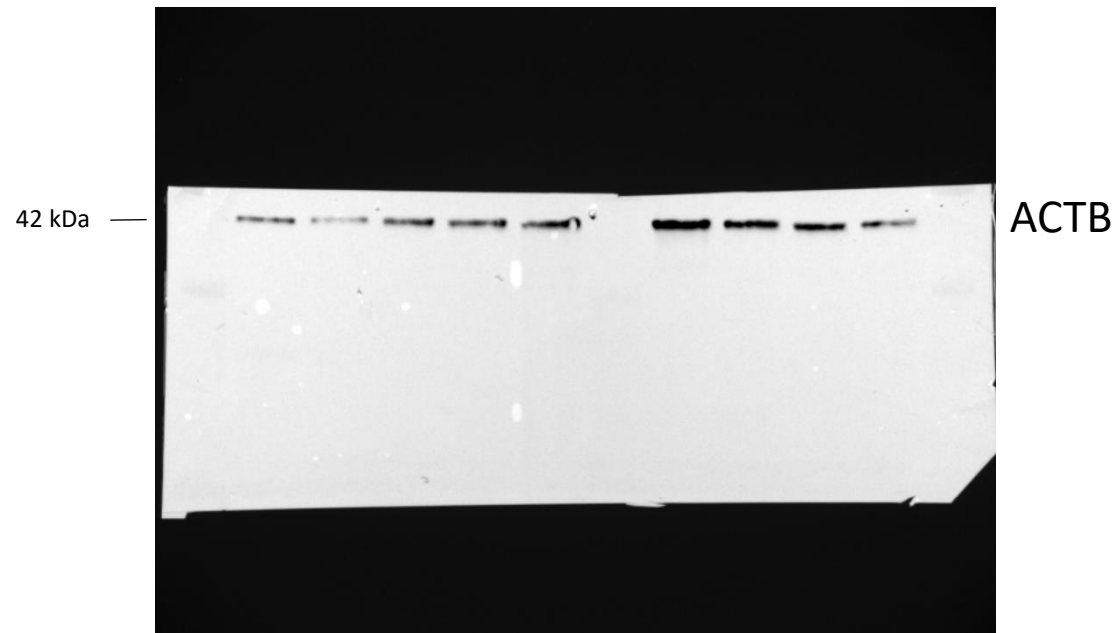

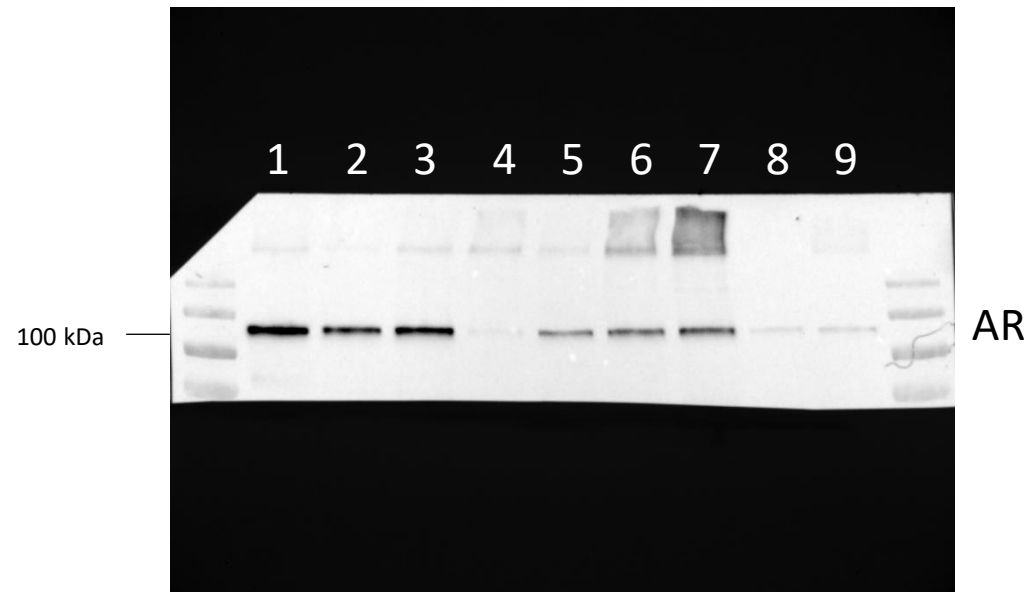

- 1 6 *dpp*
- 2 6 *dpp* CSF
- 3 D16 FT
- 4 D16 CSF
- 5 22 *dpp*
- 6 D30 FT
- 7 D30 CSF
- 8 36 *dpp*
- 9 Control

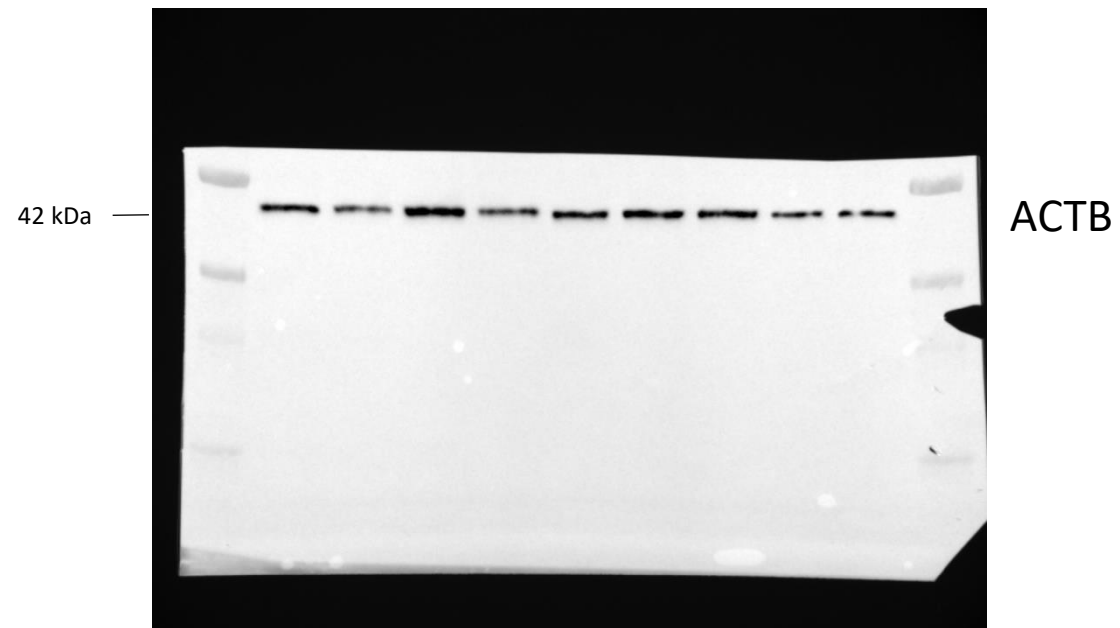

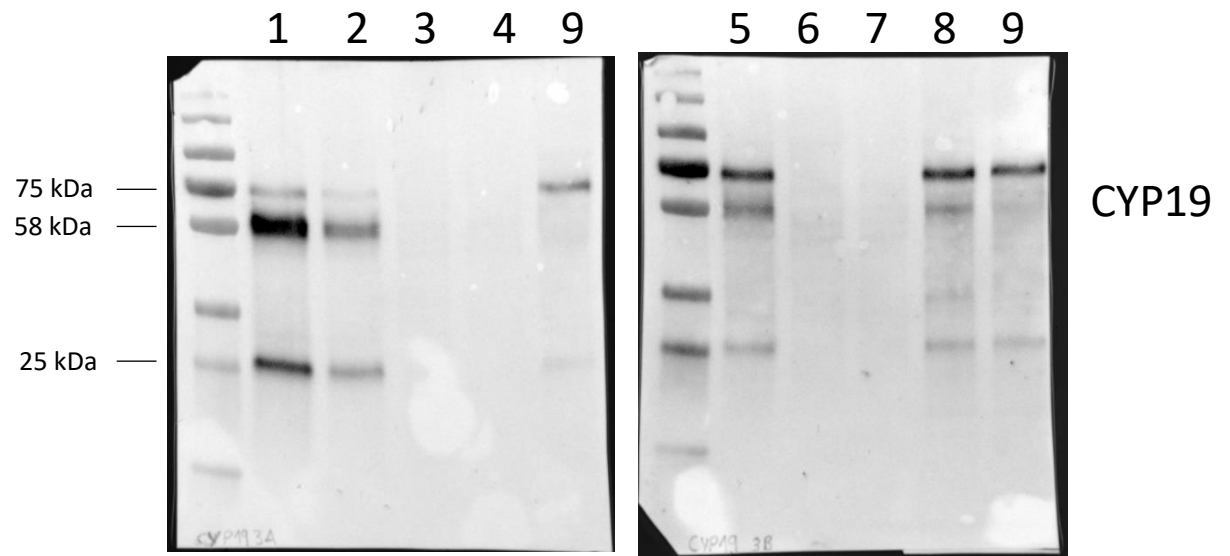

- 1 6 dpp
- 2 6 dpp CSF
- 3 D16 FT
- 4 D16 CSF
- 5 22 dpp
- 6 D30 FT
- 7 D30 CSF
- 8 36 dpp
- 9 Control

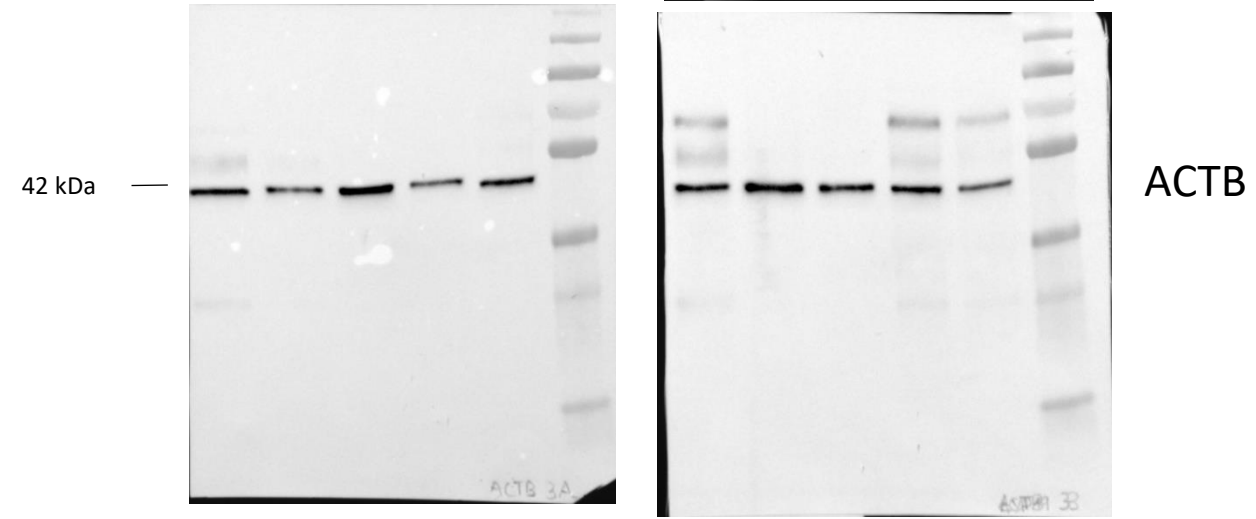

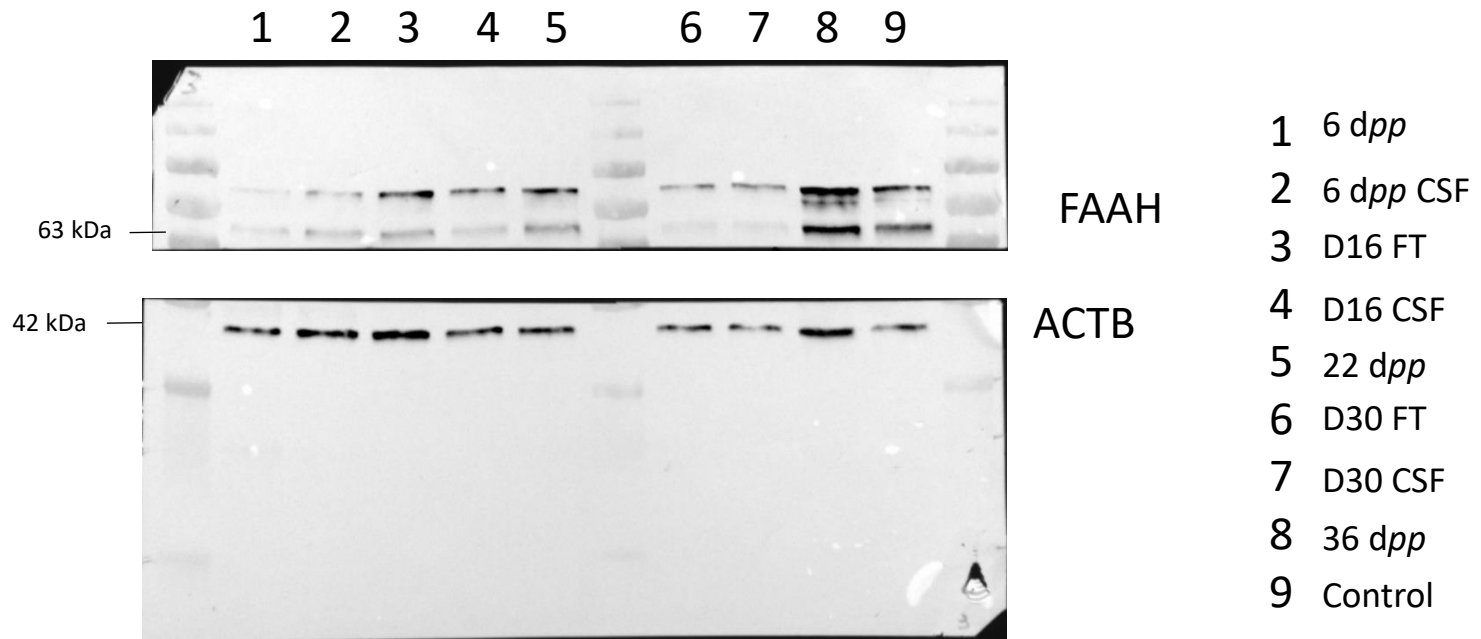

Supplement: elife-85562-data1.pdf [file elife-85562-data1.pdf]
