# Supplementary material for: Steroidogenesis and androgen/estrogen signaling pathways are altered in in vitro matured testicular tissues of prepubertal mice
Source: eLife. 2023 Dec 14;12:RP85562. doi: 10.7554/eLife.85562 (PMC10721218; doi:10.7554/eLife.85562)
Supplement: Figure 1—source data 1. [file elife-85562-fig1-data1.xlsx]

## Sheet: Fig 1
Samples	Fragment area (mm²)	Number of 3βHSD+ cells	Number of Leydig cells per cm² (Fig 1B)	Number of 3βHSD+ CC3+ cells	Number of 3βHSD+ CC3- cells	Percentage of Leydig CC3+ (in apoptosis) (Fig 1C)	Number of 3βHSD+ Ki67+ cells	Number of 3βHSD+ Ki67 -cells	Percentage of Leydig Ki67+ (in proliferation) (Fig 1D)	Number of 3βHSD+ AR+ cells	Number of 3βHSD+ AR- cells	Percentage of Leydig AR+ (Fig 1E)	Intratesticular INSL3 concentration (pg/mg of tissue) (Fig 1K)
6 dpp_1	1918.62	94	48.9936	2	92	2.12766	22	233	8.62745	46	79	36.8	N/A
6 dpp_2	695.196	44	63.2915	4	40	9.09091	1	188	0.529101	90	199	31.1419	N/A
6 dpp_3	1216.67	158	129.862	6	152	3.79747	10	153	6.13497	74	236	23.871	N/A
6 dpp_4	3542.2	176	49.6867	5	171	2.84091	N/A	N/A	N/A	15	127	10.5634	N/A
22 dpp_1	1311.46	546	416.329	8	538	1.4652	39	377	9.375	294	58	83.5227	N/A
22 dpp_2	5447.28	520	95.4605	11	509	2.11538	31	270	10.299	360	54	86.9565	N/A
22 dpp_3	4671.62	429	91.8312	10	419	2.331	19	60	24.0506	537	52	91.1715	N/A
22 dpp_4	1951.45	271	138.871	3	268	1.10701	62	751	7.62608	285	33	89.6226	N/A
D16 FT_1	1188.23	190	159.902	5	185	2.63158	11	73	13.0952	264	33	88.8889	N/A
D16 FT_2	942.06	80	84.9202	10	70	12.5	10	162	5.81395	67	10	87.013	N/A
D16 FT_3	764.149	73	95.5312	2	71	2.73973	12	77	13.4831	93	23	80.1724	N/A
D16 FT_4	832.861	72	86.449	2	70	2.77778	1	32	3.0303	221	48	82.1561	N/A
D16 FT_5	N/A	N/A	N/A	N/A	N/A	N/A	N/A	N/A	N/A	130	18	87.8378	N/A
36 dpp_1	1357.78	288	212.111	2	286	0.694444	13	444	2.84464	219	49	81.7164	0.711745
36 dpp_2	1248.17	396	317.263	4	392	1.0101	7	486	1.41988	237	55	81.1644	0.814319
36 dpp_3	6836.11	1493	218.399	16	1477	1.07167	20	372	5.10204	465	64	87.9017	0.91671
36 dpp_4	5764.75	632	109.632	3	629	0.474684	21	304	6.46154	273	102	72.8	1.16205
D30 FT_1	557.691	246	441.105	2	244	0.813008	10	171	5.52486	185	49	79.0598	0
D30 FT_2	812.62	198	243.656	2	196	1.0101	9	282	3.09278	272	32	89.4737	0
D30 FT_3	777.801	175	224.993	1	174	0.571429	7	34	17.0732	204	28	87.931	0
D30 FT_4	974.965	320	328.217	3	317	0.9375	13	135	8.78378	161	78	67.364	0
D30 FT_5	N/A	N/A	N/A	N/A	N/A	N/A	N/A	N/A	N/A	249	93	72.807	N/A
D30 FT_6	N/A	N/A	N/A	N/A	N/A	N/A	N/A	N/A	N/A	111	25	81.6176	N/A

## Sheet: Fig 1E
Samples	relative mRNA levels of Igf1 (normalized to Gapdh and Actb)	relative mRNA levels of Dhh (normalized to Gapdh and Actb)	relative mRNA levels of Srd5a1 (normalized to Hsd3b1)	relative mRNA levels of Sult1e1 (normalized to Hsd3b1)	relative mRNA levels of Insl3 (normalized to Hsd3b1)
6 dpp_1	0.561372	0.516079	0.0132313	0.00016586	0.00732991
6 dpp_2	0.572972	0.853538	0.0735069	0.00044425	0.00659376
6 dpp_3	0.383733	0.388606	0.0352326	0.00025037	0.0221801
6 dpp_4	0.513658	0.44203	0.104371	0.00266	0.0438952
22 dpp_1	0.271617	0.265433	0.976783	0.0183028	1.45627
22 dpp_2	0.373917	0.154231	0.318965	0.0668012	0.379875
22 dpp_3	0.18921	0.0265285	0.0345425	0.0203392	0.466423
22 dpp_4	0.397314	0.0767732	0.404756	0.0851049	1.00891
D16 FT_1	0.754349	0.381151	0.216331	0.0121157	0.00417191
D16 FT_2	0.495549	0.451041	0.346778	0.029924	0.0143546
D16 FT_3	1.13167	0.228448	0.034694	0.00391213	0.00348087
D16 FT_4	0.468318	0.322783	0.244902	0.0149687	0.0190913
36 dpp_1	1.19497	1.88544	1.16679	0.587922	1.44368
36 dpp_2	0.653244	0.469411	0.818466	2.29954	1.50916
36 dpp_3	1.07827	1.19501	1.43867	0.96585	0.868589
36 dpp_4	1.19934	0.954109	0.732591	0.779883	0.534319
D30 FT_1	0.446456	0.301921	0.00316701	0.0124573	0.0146633
D30 FT_2	0.64481	0.286715	0.00791868	0.0334346	0.00277698
D30 FT_3	0.593974	0.745263	0.0396695	0.0118564	0.0141309
D30 FT_4	0.595722	1.39584	0.0776409	0.0152154	0.0265466

## Sheet: Fig1F
INSL3 concentration in medium (pg/mL) (Fig 1F)
Samples	Days of culture	FT				CSF
Basal medium	0	15.6938	14.05			15.6938	14.05
J2	2	15.6938	4.92256	5.92644	5.72169	0	0	0	1.83959
J6	6	3.00518	7.34114	8.00716	4.84302	0	0	1.32615	0
J10	10	18.8861	12.4709	15.4575	16.5494	2.14005	0	0	4.88279
J14	14	13.4981	10.4832	14.3368	10.3227	13.0955	9.75003		14.0549
J16	16	11.1209	16.3502	2.13506	9.40725	8.52244	5.95428	7.94851	3.04629
J18	18	12.1838		19.7709	14.0749	9.98331	16.5651	5.88004
J22	22	19.0164	18.8991	23.4524	19.4254	22.6819	22.4746	25.4128	4.84231
J26	26	27.3317	26.6094	24.2942	21.6951	27.9077	26.3186	23.0269	17.3153
J30	30	30.3664	32.0581	29.9316	50.5688	32.8643	45.8973		30.8989
