# Supplementary material for: Steroidogenesis and androgen/estrogen signaling pathways are altered in in vitro matured testicular tissues of prepubertal mice
Source: eLife. 2023 Dec 14;12:RP85562. doi: 10.7554/eLife.85562 (PMC10721218; doi:10.7554/eLife.85562)
Supplement: Figure 2—source data 1. [file elife-85562-fig2-data1.xlsx]

## Sheet: Fig 2
Samples	relative mRNA levels of Lhcgr (normalized to Hsd3b1) (Fig 2A)	relative mRNA levels of Star (normalized to Hsd3b1) (Fig 2B)	relative mRNA levels of Cyp11a1 (normalized to Hsd3b1) (Fig 2C)	relative mRNA levels of Hsd3b1 (normalized to Gapdh and Actb) (Fig 2D)	relative mRNA levels of Cyp17a1 (normalized to Hsd3b1) (Fig 2F)	relative mRNA levels of Hsd17b3 (normalized to Hsd3b1) (Fig 2H)	relative mRNA levels of Hsd17b2 (normalized to Hsd3b1) (Fig 2I)
6 dpp_1	0.340923	0.311155	0.0857613	0.876008	0.452146	6.59674	0.00305605
6 dpp_2	0.27898	0.102063	0.030721	0.826877	0.116429	4.36796	0.0024784
6 dpp_3	0.531603	0.184697	0.0630002	0.751493	0.103667	2.52817	0.00456236
6 dpp_4	0.471176	0.229804	0.0654051	0.33262	0.319123	8.21381	0.0155559
6 dpp CSF_1	0.307245	0.124931	0.0161035	0.541436	0.392805	3.90783	0.0136547
6 dpp CSF_2	0.243431	0.301615	0.0200198	0.356186	0.601225	10.0402	0.0375083
6 dpp CSF_3	0.350134	0.240767	0.00479204	0.629764	0.112769	4.90447	0.00214143
6 dpp CSF_4	0.159294	0.195097	0.0978225	0.556947	0.0751778	0.69101	0.00260688
6 dpp CSF_5	0.333871	0.299072	0.0118859	0.510814	0.070787	0.917906	0.01156
22 dpp_1	1.20611	2.02383	0.415177	0.209182	1.90193	1.22429	2.45076
22 dpp_2	1.76797	1.89564	0.329607	0.303922	1.82852	1.7441	4.13198
22 dpp_3	0	2.13856	0.950973	0.182969	1.8363	1.21247	7.09623
22 dpp_4	0.999299	1.37836	0.275885	0.398985	0.896002	1.14646	0.941093
D16 FT_1	0.928534	0.579233	0.269621	0.21368	0.0242394	0.0863613	0.772156
D16 FT_2	1.08724	0.631907	0.254125	0.223256	0.0263323	0.0614969	0.634914
D16 FT_3	0.953488	0.586859	0.164876	0.217107	0.0197035	0.0558388	0.507123
D16 FT_4	0.902402	0.463663	0.160237	0.35554	0.0194354	0.0711541	0.958433
D16 CSF_1	0.523968	0.102515	0.247475	0.927894	0.0226313	0.00976449	0.0894518
D16 CSF_2	0.80914	0.269457	0.296443	0.356868	0.0436032	0.0256914	1.57636
D16 CSF_3	1.05777	0.41901	0.0749158	0.215244	0.0366678	0.0596427	0.538564
D16 CSF_4	1.37017	0.599429	0.0970412	0.214239	0.0393208	0.0514726	0.467537
36 dpp_1	0.755024	0.816479	1.00094	1.18041	0.880378	0.799709	0.645952
36 dpp_2	0.808673	0.927472	0.886645	0.996768	0.605438	1.02901	2.92177
36 dpp_3	1.30875	1.35072	1.05776	0.840715	1.37068	1.18349	0.891087
36 dpp_4	1.25645	1.34814	1.11816	1.01202	1.16313	1.03274	0.624739
36 dpp_5	0.922711	0.892181	1.00087	1.0295	0.767828	0.916932	N/A
36 dpp_6	0.827201	0.838704	0.833764	1.71146	1.03954	0.599303	N/A
36 dpp_7	1.13704	1.28916	1.16177	0.730067	1.19028	1.36286	N/A
36 dpp_8	1.1669	1.15823	1.14986	0.933285	1.07263	1.11986	N/A
D30 FT_1	0.264072	0.354863	0.0327413	0.348944	0.429239	2.11567	0.0501956
D30 FT_2	0.482501	0.621557	0.0841892	0.705167	0.10685	0.342135	0.0133588
D30 FT_3	0.224323	0.421334	0.0362084	0.585768	0.0378022	0.280433	0.0150343
D30 FT_4	0.212788	1.21296	0.028509	0.499965	0.0409633	0.520971	0.0134638
D30 CSF_1	0.651075	0.21287	0.0249248	0.64193	0.12083	0.145402	0.0880982
D30 CSF_2	1.40758	0.128239	0.0663911	0.518188	0.110033	0.0740078	0.0405418
D30 CSF_3	2.66372	0.830369	0.0474247	0.477359	0.0211392	0.0281218	0.0635298
D30 CSF_4	0.352168	0.31854	0.177933	0.52179	0.0193392	0.0257272	0.10614
D30 CSF_5	0.377645	0.365783	0.179772	0.496738	0.0243099	0.028913	N/A

## Sheet: WB
3βHSD	Sample_1				Sample_2				Sample_3				Sample_4
Samples	3βHSD	ACTB	3βHSD normalized to ACTB	relative 3βHSD protein levels (normalized to ACTB)	3βHSD	ACTB	3βHSD normalized to ACTB	relative 3βHSD protein levels (normalized to ACTB)	3βHSD	ACTB	3βHSD normalized to ACTB	relative 3βHSD protein levels (normalized to ACTB)	3βHSD	ACTB	3βHSD normalized to ACTB	relative 3βHSD protein levels (normalized to ACTB)
6 dpp	2508790	14921254	0.168135	1.4482	6445656	12667664	0.508828	0.658541	2259738	3405992	0.66346	0.490101	1025498	4932726	0.207897	0.589137
6 dpp CSF	301542	7872572	0.0383029	0.329915	377348	2248196	0.167845	0.21723	968194	6523782	0.14841	0.109631	787698	4288114	0.183693	0.52055
D16 FT	217268	16493054	0.0131733	0.113466	349914	16492648	0.0212164	0.0274589	1128042	19841742	0.056852	0.0419968	361282	22015524	0.0164103	0.0465035
D16 CSF	159326	2731104	0.0583376	0.50248	5999172	4999774	1.19989	1.55293	2373128	7090674	0.334683	0.247232	328048	5551818	0.0590884	0.167444
36 dpp (Ctrl 1)	472932	4073514	0.116099	1	9214750	11926018	0.772659	1	13980204	10327248	1.35372	1	1439154	4078270	0.352883	1
22 dpp	746924	9132158	0.0817905	0.0989382	1050786	11797026	0.0890721	0.118655	3194640	13730688	0.232664	0.303593	1559736	10223080	0.15257	0.208639
D30 FT	13036892	17643948	0.738887	0.893798	6365500	14754678	0.431422	0.574706	2391224	7867642	0.303931	0.396586	12709076	14976064	0.848626	1.1605
D30 CSF	14722604	14979834	0.982828	1.18888	7183590	13291164	0.540479	0.719982	3549832	11726324	0.302723	0.39501	7686566	13673036	0.56217	0.768767
36 dpp	13891696	13789268	1.00743	1.21864	10679424	12732682	0.838741	1.1173	19888432	14393222	1.38179	1.80304	1537638	2238046	0.687045	0.939533
36 dpp (Ctrl 1)	3048364	3687466	0.826683	1	8060318	10737308	0.750683	1	4743066	6189006	0.76637	1	5885550	8048486	0.731262	1
CYP17A1	Sample_1			Sample_2			Sample_3			Sample_4
Samples	CYP17A1/ACTB	3βHSD/ACTB	relative CYP17A1 protein levels (normalized to 3βHSD)	CYP17A1/ACTB	3βHSD/ACTB	relative CYP17A1 protein levels (normalized to 3βHSD)	CYP17A1/ACTB	3βHSD/ACTB	relative CYP17A1 protein levels (normalized to 3βHSD)	CYP17A1/ACTB	3βHSD/ACTB	relative CYP17A1 protein levels (normalized to 3βHSD)
6 dpp	0.0204485	1.4482	0.0141199	0.0747782	0.658541	0.113551	0.0746537	0.490101	0.152323	0.139864	0.589137	0.237405
6 dpp CSF	0.24319	0.329915	0.737131	0.0716172	0.21723	0.329684	0.0438203	0.109631	0.399706	0.243356	0.52055	0.467499
D16 FT	0.00286971	0.113466	0.0252914	0.00959562	0.0274589	0.349454	0.0162232	0.0419968	0.386297	0.0245879	0.0465035	0.528732
D16 CSF	0.023023	0.50248	0.0458187	0.0520611	1.55293	0.0335243	0.0345366	0.247232	0.139693	0.0355739	0.167444	0.212452
22 dpp	0.058088	0.0989382	0.587114	0.100616	0.118655	0.847972	0.0429298	0.303593	0.141406	0.258164	0.208639	1.23737
D30 FT	0.019933	0.893798	0.0223014	0.0392296	0.574706	0.0682602	0.0201361	0.396586	0.0507737	0.0214588	1.1605	0.0184911
D30 CSF	0.0259125	1.18888	0.0217957	0.0340884	0.719982	0.0473461	0.0245704	0.39501	0.062202	0.02412	0.768767	0.0313749
36 dpp	0.495211	1.21864	0.406364	0.877931	1.1173	0.785759	0.699384	1.80304	0.387893	0.824508	0.939533	0.877572
36 dpp (Ctrl 1)	1	1	1	1	1	1	1	1	1	1	1	1
