# Supplementary material for: Steroidogenesis and androgen/estrogen signaling pathways are altered in in vitro matured testicular tissues of prepubertal mice
Source: eLife. 2023 Dec 14;12:RP85562. doi: 10.7554/eLife.85562 (PMC10721218; doi:10.7554/eLife.85562)
Supplement: Figure 3—source data 1. [file elife-85562-fig3-data1.xlsx]

## Sheet: Fig 3
Samples	Progesterone intratesticular concentration (pg/µg protein) (Fig 3A)	Androstenedione intratesticular concentration (pg/µg protein) (Fig 3B)	Testosterone intratesticular concentration (pg/µg protein) (Fig 3C)	Estradiol intratesticular concentration (pg/µg protein) (Fig 3D)	Cholesterol concentration (µg/mg tissue) total (Fig 3G)	Cholesterol concentration (µg/mg tissue) Free (Fig 3G)	Cholesterol concentration (µg/mg tissue) Esterified (Fig 3G)
6 dpp_1	1.75278	5.68466	3.60868	4.41094	0.458178	0.343602	0.114576
6 dpp_2	2.86308	2.52971	2.06935	1.55337	0.506089	0.382057	0.124032
6 dpp_3	3.39783	4.48369	4.1535	2.96616	0.470264	0.349448	0.120815
6 dpp_4	2.80693	13.5723	20.3792	3.69356	0.615132	0.499723	0.115409
6 dpp CSF_1	10.6977	1.69547	1.46124	24.6053	0.515846	0.360921	0.154925
6 dpp CSF_2	5.89339	1.90678	1.36897	38.3216	0.505395	0.315902	0.189493
6 dpp CSF_3	4.69595	1.79836	1.10051	8.59211	0.543296	0.304626	0.23867
6 dpp CSF_4	4.25303	9.33465	4.13736	6.20913	0.253352	0.232515	0.0208368
22 dpp_1	0.633082	2.83538	0.78338	0.75779	0.63776	0.366776	0.270984
22 dpp_2	0.479788	3.69057	1.20141	0.200038	0.693628	0.44255	0.251078
22 dpp_3	0.280369	3.16754	0.41615	0.0650453	0.537389	0.416371	0.121018
22 dpp_4	0.287943	4.69314	1.53131	0.0623157	0.456082	0.437234	0.0188479
D16 FT_1	50.8813	0.978463	1.35725	12.6689	1.00184	0.28617	0.715673
D16 FT_2	50.7686	0.569673	0.96279	7.52513	1.18362	0.965715	0.217905
D16 FT_3	21.3486	0.645229	1.68241	24.5411	1.31651	0.93397	0.382542
D16 FT_4	14.8276	0.611782	1.43636	13.9277	0.977072	1.0471	0
D16 CSF_1	123.124	1.73409	2.78143	62.6587	1.01633	0.736261	0.280069
D16 CSF_2	93.0651	0.832102	1.15831	34.142	1.01619	0.767907	0.248287
D16 CSF_3	63.6168	0.739837	1.23354	63.352	0.936028	0.823453	0.112575
D16 CSF_4	41.8854	1.03243	1.26222	39.9338	1.22812	0.989719	0.2384
36 dpp_1	0.0998077	7.24557	5.83713	0.0850397	0.651628	0.31977	0.331858
36 dpp_2	0.0873061	12.6856	11.2245	0.0401051	0.614659	0.216263	0.398397
36 dpp_3	0.125211	3.228	1.35057	0.0236896	0.310299	0.27783	0.0324685
36 dpp_4	0.123765	2.89926	1.24759	0.0698012	0.627006	0.376638	0.250368
D30 FT_1	89.0496	2.2247	1.36213	4.78827	1.33215	0.979583	0.352565
D30 FT_2	40.195	1.90547	0.90162	5.10401	1.55774	0.890319	0.667418
D30 FT_3	43.517	2.03229	0.542731	9.93291	1.09545	0.861023	0.234423
D30 FT_4	47.5279	1.62171	0.716809	18.613	1.03806	0.841439	0.196623
D30 CSF_1	32.4638	3.01615	2.562	7.59231	1.01932	1.22167	0
D30 CSF_2	51.2518	2.77463	2.34484	7.6823	1.13836	0.742155	0.396204
D30 CSF_3	14.1337	15.3846	3.05758	38.9687	0.910308	0.829535	0.0807736
D30 CSF_4	76.2612	6.73543	1.98835	45.7438	1.29066	0.82894	0.461716

## Sheet: Fig 3E
concentration in medium (ng/mL) (Fig 3E)
Days of culture	Progesterone				Androstenedione				Testosterone				Basal Progesterone	Basal Androstenedione	Basal Testosterone
0													0.0834252	0	0.07
2	N/A	N/A	N/A	N/A	1.19	1.37	1.12	1.4	14.76	18.75	16.43	16.52	0.0834252	0	0.07
6	0.117243	0.135779	0.265154	0.0657212	0.52	0.6	0.61	1.27	9.41	10.96	11.35	19.96	0.0834252	0	0.07
10	0.1215	0.148189	0.114243	0.161516	0.53	0.57	0.41	0.78	8.18	7.67	6.42	9.62	0.0834252	0	0.07
14	0.116496	0.09474	0.0795499	0.198133	0.54	0.6	0.4	0.77	6.07	5.76	4.56	6.12	0.0834252	0	0.07
16	N/A	N/A	N/A	N/A	0.69	0.73	0.72	0.49	7.96	5.5	3.85	6.51	0.0834252	0	0.07
18	0.0949042	0.156189	0.16457	0.153118	1.18	1.1	0.93	1.16	7.58	6.29	5.69	7.05	0.0834252	0	0.07
22	0.138331	0.102873	0.179656	0.181598	1.8	1.79	1.65	1.46	8.8	6.78	7.02	7.21	0.0834252	0	0.07
26	0.158841	0.198175	0.298212	0.314724	1.84	2.52	2.14	1.96	6.88	6.47	6.77	11.98	0.0834252	0	0.07
30	0.346	0.174228	0.141987	0.127726	2.47	4.02	3.76	2.89	33.74	9.64	11.92	16.3	0.0834252	0	0.07
concentration in medium (pg/mL) (Fig 3F)
Days of culture	Estradiol				Basal medium
0					13.1867
6	21.3446	31.2055	33.1156	33.0228	13.1867
14	34.441	25.1992	49.117	29.5471	13.1867
22	29.727	27.2585	21.0108	38.488	13.1867
30	28.6918	30.572	46.3782	39.232	13.1867
