# Supplementary material for: Steroidogenesis and androgen/estrogen signaling pathways are altered in in vitro matured testicular tissues of prepubertal mice
Source: eLife. 2023 Dec 14;12:RP85562. doi: 10.7554/eLife.85562 (PMC10721218; doi:10.7554/eLife.85562)
Supplement: Figure 4—source data 1. [file elife-85562-fig4-data1.xlsx]

## Sheet: Fig 4
Samples	relative mRNA levels of Ar (normalized to Gapdh and Actb) (Fig 4A)	relative mRNA levels of Rhox5 (normalized to Gapdh and Actb) (Fig 4D)	relative mRNA levels of Septin12 (normalized to Gapdh and Actb) (Fig 4E)	relative mRNA levels of Eppin (normalized to Gapdh and Actb) (Fig 4F)	relative mRNA levels of Abp (normalized to Gapdh and Actb) (Fig 4G)
6 dpp_1	1.28301	0.00831923	0.00790794	4.19672	1.38612
6 dpp_2	0.876979	0.0161716	0.00898601	2.97814	5.566
6 dpp_3	1.36041	0.0123816	0.00148792	1.11689	2.58985
6 dpp_4	0.772253	0.00308233	0.00129359	1.23447	2.44841
6 dpp CSF_1	1.22682	0.0146809	0	2.94034	2.30013
6 dpp CSF_2	0.630466	0.00575548	0.00651318	1.44039	2.8799
6 dpp CSF_3	0.441052	0	0	1.53799	1.35356
6 dpp CSF_4	1.04789	0.0157234	0.00190431	0.391337	1.43936
6 dpp CSF_5	0.702222	0.00777663	0.000828925	0.131138	1.57691
22 dpp_1	1.09117	0.610089	1.15914	4.66621	2.09294
22 dpp_2	0.942219	0.572212	1.0529	5.62584	1.85614
22 dpp_3	0	1.99851	1.95222	17.0498	1.08073
22 dpp_4	1.00832	0.619346	1.69923	7.83132	0.271962
D16 FT_1	1.31221	0.00544848	0.147443	1.05438	2.33009
D16 FT_2	1.20804	0.00988365	0.20619	1.271	2.27673
D16 FT_3	1.63031	0.0207876	0.189722	2.00696	1.92699
D16 FT_4	1.52941	0.0203018	0.196042	2.16304	3.15452
D16 CSF_1	1.92155	0.00535881	0.0901847	1.94865	0
D16 CSF_2	1.54973	0.00403912	0.0962595	1.52555	2.55157
D16 CSF_3	1.17837	0.00608097	0.268715	3.50038	2.86943
D16 CSF_4	1.05936	0.00282368	0.0818147	1.07591	3.38298
36 dpp_1	0.868486	1.01852	0.952176	1.02927	1.27917
36 dpp_2	1.57107	1.37473	1.00733	1.1787	0.763889
36 dpp_3	0.870411	0.922618	1.00103	0.972964	1.06326
36 dpp_4	1.0402	0.91506	1.02365	0.854568	0.967266
D30 FT_1	1.46511	0.0345037	0.712737	21.4089	1.1875
D30 FT_2	2.42537	0.0553876	0.670671	17.6688	1.2405
D30 FT_3	1.80431	0.0318325	0.307124	20.9833	4.34962
D30 FT_4	2.18051	0.0482475	0.301329	16.0245	2.45643
D30 CSF_1	1.25721	0.0166495	0.33559	13.6022	1.7314
D30 CSF_2	1.0751	0.0079851	0.116513	2.63389	3.06261
D30 CSF_3	1.46748	0.0143517	0.0939936	1.45094	1.66517
D30 CSF_4	1.52801	0.0101198	0.101857	1.68426	2.05136

## Sheet:  Fig 4B
AR	Sample_1				Sample_2				Sample_3				Sample_4
Samples	AR	ACTB	AR normalized to ACTB	relative AR protein levels (normalized to ACTB)	AR	ACTB	AR normalized to ACTB	relative AR protein levels (normalized to ACTB)	AR	ACTB	AR normalized to ACTB	relative AR protein levels (normalized to ACTB)	AR	ACTB	AR normalized to ACTB	relative AR protein levels (normalized to ACTB)
6 dpp	13086117	4464192	2.93135	8.286	16735432	9132642	1.83249	12.5811	10728575	4717440	2.27424	17.0113	9213997	7180596	1.28318	5.57524
6 dpp CSF	7112403	3765840	1.88866	5.33865	9927400	6288980	1.57854	10.8376	9614110	6862512	1.40096	10.4792	10124378	5932167	1.70669	7.41534
D16 FT	12832581	12205440	1.05138	2.97192	12915952	13766379	0.938224	6.44149	9540575	7357152	1.29678	9.69987	14893954	8435298	1.76567	7.67159
D16 CSF	255075	5011240	0.0509006	0.14388	288915	7493458	0.0385556	0.264708	176770	3693552	0.0478591	0.357986	813709	7910406	0.102866	0.446937
22 dpp	6950637	8306774	0.836743	2.36521	4050063	9074395	0.446318	3.06425	4083145	5980032	0.682797	5.10731	3641418	6300030	0.578	2.51133
D30 FT	9609345	11005841	0.873113	2.46801	6034626	10987695	0.549217	3.77071	6489560	7529856	0.861844	6.44658	7850254	6197163	1.26675	5.50385
D30 CSF	7479996	9520221	0.785696	2.22091	7311003	10035444	0.728518	5.00173	10309035	10900128	0.945772	7.07437	7629668	13994961	0.545173	2.3687
36 dpp	1225842	5109792	0.239901	0.678123	644028	5605121	0.1149	0.788859	492305	5570976	0.0883696	0.661004	1219583	4216527	0.289239	1.2567
36 dpp (Ctrl 1)	1905396	5385952	0.353771	1	934167	6413636	0.145653	1	584375	4371120	0.13369	1	1252973	5443995	0.230157	1
