# Supplementary material for: Steroidogenesis and androgen/estrogen signaling pathways are altered in in vitro matured testicular tissues of prepubertal mice
Source: eLife. 2023 Dec 14;12:RP85562. doi: 10.7554/eLife.85562 (PMC10721218; doi:10.7554/eLife.85562)
Supplement: Figure 5—source data 1. [file elife-85562-fig5-data1.xlsx]

## Sheet: Fig 5
Samples	relative mRNA levels of Cyp19a1 (normalized to Gapdh and Actb) (Fig 5A)	CYP19 Activity (nU/mg) Fig 5D	relative mRNA levels of Esr1 (normalized to Gapdh and Actb) (Fig 5E)	relative mRNA levels of Esr2 (normalized to Gapdh and Actb) (Fig 5F)	relative mRNA levels of Gper1 (normalized to Gapdh and Actb) (Fig 5G)	relative mRNA levels of Faah (normalized to Gapdh and Actb) (Fig 5H)
6 dpp_1	0	N/A	0.920461	12.5273	16.1622	0.0468757
6 dpp_2	0	N/A	0.765264	8.02734	5.37352	0.0767161
6 dpp_3	0	N/A	0.894527	4.13951	4.00973	0.0990367
6 dpp_4	0	N/A	0.444732	1.47939	5.04883	0.0715274
6 dpp CSF_1	0	N/A	0.386461	0	0	0.123783
6 dpp CSF_2	0.0160957	N/A	0.899249	0	7.92888	0.0711784
6 dpp CSF_3	0	N/A	0.834088	0	23.3587	0.0847996
6 dpp CSF_4	0	N/A	0.854085	2.88036	5.26223	0.118865
6 dpp CSF_5	0.00433048	N/A	0.830266	3.31918	3.58949	0.1328
22 dpp_1	0	N/A	0.902784	2.79688	2.76627	0.763554
22 dpp_2	0.101521	N/A	0.731851	0	1.08998	0.420663
22 dpp_3	0	N/A	6.68981	0	0	1.08689
22 dpp_4	0	N/A	0.718662	0	1.44118	0.68072
D16 FT_1	0.047231	N/A	0.283829	0.498107	1.33764	0.354497
D16 FT_2	0.0413537	N/A	0.286368	0.999833	1.54211	0.410153
D16 FT_3	0.0160301	N/A	0.302108	1.06099	2.31747	0.471518
D16 FT_4	0.053419	N/A	0.346275	0.736998	2.11649	0.388865
D16 CSF_1	0.0691818	N/A	0.289887	0.022994	3.54441	0.178717
D16 CSF_2	0.00601875	N/A	0.469851	0.511728	2.27093	0.284384
D16 CSF_3	0.0180248	N/A	0.230465	2.08693	6.60375	0.186214
D16 CSF_4	0.017525	N/A	0.27539	0.504672	1.83469	0.16163
36 dpp_1	1.18562	0.120463	0.950084	1.22117	1.10774	0.802709
36 dpp_2	1.08513	0.348183	1.68208	1.14116	1.10774	1.70124
36 dpp_3	1.11042	0.634768	0.798472	0.853523	1.37113	0.9181
36 dpp_4	1.03216	0.633388	0.98696	1.01849	0.812983	0.964038
D30 FT_1	0	0	0.539789	0	0	0.16373
D30 FT_2	0	0.0838308	0.0874681	0	0	0.0621624
D30 FT_3	0	0.178164	0.104159	0	0	0.12224
D30 FT_4	0	0.0699376	0	0	0	0.284832
D30 CSF_1	0.0434211	0	0.374947	0	0	0.102792
D30 CSF_2	0.094923	0	0.448944	0.50698	1.36444	0.130211
D30 CSF_3	0.025842	0	0.304276	0.359306	1.29015	0.189856
D30 CSF_4	0.0338015	0	0.335616	0.39462	2.09657	0.190965

## Sheet: WB (B & I)
CYP19A1 (Fig 5B)	Sample_1							Sample_2							Sample_3							Sample_4
Samples	CYP19 (1 75kDa)	CYP19 (2 58 kDa)	CYP19 (3 25 kDa)	CYP19	ACTB	CYP19 normalized to ACTB	relative CYP19 protein levels (normalized to ACTB)	CYP19 (1 75kDa)	CYP19 (2 58 kDa)	CYP19 (3 25 kDa)	CYP19	ACTB	CYP19 normalized to ACTB	relative CYP19 protein levels (normalized to ACTB)	CYP19 (1 75kDa)	CYP19 (2 58 kDa)	CYP19 (3 25 kDa)	CYP19	ACTB	CYP19 normalized to ACTB	relative CYP19 protein levels (normalized to ACTB)	CYP19 (1 75kDa)	CYP19 (2 58 kDa)	CYP19 (3 25 kDa)	CYP19	ACTB	CYP19 normalized to ACTB	relative CYP19 protein levels (normalized to ACTB)
6 dpp	3573700	31814796	17082676	52471172	13869830	3.78312	5.84063	3172895	35772440	13463615	52408950	12836780	4.08272	5.53845	5127490	40205600	20982950	66316040	12776704	5.19039	8.10884	3530808	25807390	12880060	42218258	7237530	5.83324	7.08525
6 dpp CSF	0	3446196	5831436	9277632	5928644	1.56488	2.41597	0	8652215	2089505	10741720	3994375	2.68921	3.64807	1212548	14966552	7851692	24030792	8276310	2.90356	4.53618	0	6159600	2656400	8816000	2194894	4.01659	4.87869
D16 FT	0	0	0	0	17962716	0	0	0	0	0	0	14982605	0	0	0	0	0	0	16457848	0	0	0	0	0	0	16607430	0	0
D16 CSF	0	0	0	0	4902798	0	0	0	0	0	0	3634180	0	0	0	0	0	0	7052858	0	0	0	0	0	0	5466442	0	0
36 dpp (Ctrl 1)	5374564	423852	708656	6507072	10046064	0.647724	1	4714875	0	0	4714875	6396005	0.737159	1	6306746	0	1138424	7445170	11631436	0.64009	1	4188934	567356	0	4756290	5777148	0.823294	1
22 dpp	4245725	190795	772970	5209490	8802138	0.591844	0.606411	2453770	755315	0	3209085	7521525	0.426654	#REF!	11844412	8801616	4266248	24912276	12171590	2.04676	0.971143	9711056	4476150	4319260	18506466	8503844	2.17625	0.685104
D30 FT	0	249260	0	249260	15765908	0.0158101	0.0244087	0	0	0	0	13271500	0	0	0	0	0	0	18095826	0	0	0	1386838	1803336	3190174	18770540	0.169956	0.0535039
D30 CSF	0	586355	0	586355	12428356	0.0471788	0.0728379	0	0	0	0	12370820	0	0	0	0	0	0	12654150	0	0	0	1116152	1358476	2474628	16200908	0.152746	0.048086
36 dpp	4327125	186670	1168145	5681940	4626660	1.22809	1.896	19522305	3157770	4310955	26991030	9923485	2.71991	1.73347	13755512	5543814	3068084	22367410	11865698	1.88505	0.894416	14674058	4011338	3471938	22157334	2593876	8.54217	2.68916
36 dpp (Ctrl 1)	9169820	788425	1834470	11792715	12082966	0.975978	1	12752355	1320715	2097535	16170605	10305955	1.56905	1	11449664	1441938	2690852	15582454	7393550	2.10757	1	7971114	8475714	2821178	19268006	6065756	3.17652	1
FAAH (Fig 5I)	Sample_1						Sample_2						Sample_3						Sample_4
Samples	FAAH (isoforme 1)	FAAH (isoforme 2 85kDa)	FAAH	ACTB	FAAH normalized to ACTB	relative FAAH protein levels (normalized to ACTB)	FAAH (isoforme 1)	FAAH (isoforme 2)	FAAH	ACTB	FAAH normalized to ACTB	relative FAAH protein levels (normalized to ACTB)	FAAH (isoforme 1)	FAAH (isoforme 2)	FAAH	ACTB	FAAH normalized to ACTB	relative FAAH protein levels (normalized to ACTB)	FAAH (isoforme 1)	FAAH (isoforme 2)	FAAH	ACTB	FAAH normalized to ACTB	relative FAAH protein levels (normalized to ACTB)
6 dpp	863775	717480	1581255	5067480	0.31204	0.102267	3495816	978236	4474052	4569840	0.979039	0.528527	696344	410344	1106688	4929320	0.224511	0.0770694	1438536	526548	1965084	1389124	1.41462	0.348324
6 dpp CSF	1115460	1798920	2914380	4593116	0.63451	0.207952	7435624	3076066	10511690	3278385	3.20636	1.73093	1566004	1279036	2845040	7509392	0.378864	0.130055	1431804	390940	1822744	810040	2.25019	0.554067
D16 FT	1708830	6190695	7899525	9885744	0.799082	0.261888	2258784	4690620	6949404	8593650	0.808667	0.436553	2097788	5697208	7794996	9559924	0.815383	0.279901	7226296	4652472	11878768	9529784	1.24649	0.306924
D16 CSF	1275570	4793940	6069510	3451096	1.75872	0.576396	5782568	1984946	7767514	2596365	2.99169	1.61504	867988	3303344	4171332	5365228	0.777475	0.266889	2116532	2255000	4371532	1633940	2.67545	0.65878
22 dpp	5295375	11141415	16436790	7248648	2.26757	0.743163	4279886	5242436	9522322	6715800	1.4179	0.765443	2614524	5419436	8033960	5544880	1.4489	0.497372	7946400	2170168	10116568	2862288	3.53443	0.870288
D30 FT	1341945	4853340	6195285	7656484	0.809155	0.265189	1078884	2059466	3138350	6525800	0.480914	0.259618	526240	1641288	2167528	4137056	0.52393	0.179853	1720356	2740188	4460544	2366496	1.88487	0.464114
D30 CSF	974295	3792105	4766400	5667596	0.840991	0.275623	434010	1788158	2222168	6831495	0.325283	0.175602	636328	2423872	3060200	2996488	1.02126	0.350575	1285108	2285712	3570820	3609672	0.989237	0.243581
36 dpp	3958605	5440095	9398700	2460128	3.82041	1.25209	10029334	6194866	16224200	8462430	1.9172	1.03499	8699592	10132540	18832132	8061592	2.33603	0.801904	10868132	6491452	17359584	9616596	1.80517	0.444489
36 dpp (Ctrl 1)	6108525	9222120	15330645	5024404	3.05124	1	6341146	3920028	10261174	5539424	1.85239	1	5778212	5025416	10803628	3708628	2.91311	1	7439036	2107864	9546900	2350744	4.06122	1
