# Supplementary material for: Steroidogenesis and androgen/estrogen signaling pathways are altered in in vitro matured testicular tissues of prepubertal mice
Source: eLife. 2023 Dec 14;12:RP85562. doi: 10.7554/eLife.85562 (PMC10721218; doi:10.7554/eLife.85562)
Supplement: Figure 6—figure supplement 1—source data 1. [file elife-85562-fig6-figsupp1-data1.xlsx]

## Sheet: Fig S4
Testosterone concentration in medium (ng/mL) (Fig S6-1A)
Days of culture / hCG dose (nM)	0				0.005				0.050				1				5				50
16	7.96	5.5	3.85	6.51	4.82	7.02	7.14	4.49	4.87	4.4	4.7	4.9	12.82	8.19	8.93	7.8	9.55	10.35	5.48	6.29	6.42	6.61	4.31	14.41
22	8.8	6.78	7.02	7.21	20.84	21.02	25.19	27.02	52.44	74.4	48.51	64.33	178.32	137.64	220.97	185.31	238.84	367.01	183.37	201.65	255.58	204.11	196.58	268.02
30	33.74	9.64	11.92	16.3	20.65	35.09	17.26	23.05	131.83	172.85	82.47	118.37	262.65	217.13	258.53	341.78	281.21	300.07	222.48	222.36	319.22	180.6	128.87	265.19
Testosterone intratesticular concentration (% of control) (Fig S6-1B)
Concentration of hCG (nM)	T
0	27.714	18.3444	11.0424	14.5842
0.005	58.6075	45.7114	44.1207	39.3335
0.05	322.073	306.347	462.155	286.248
1	805.225	494.57	430.202	613.428
5	716.873	652.436	752.398	475.182
50	681.997	500.575	601.013	720.039
Testosterone concentration in medium after 30 days of culture (% of control without hCG) (Fig S6-1B)
Concentration of hCG (nM)	T
0	188.514	53.8674	66.5773	91.0416
0.005	115.35	196.011	96.4105	128.786
0.05	736.473	965.641	460.739	661.287
1	1467.36	1213.05	1444.34	1909.44
5	1571.07	1676.4	1242.94	1242.26
50	1783.38	1008.96	719.97	1481.53
