# Supplementary material for: Steroidogenesis and androgen/estrogen signaling pathways are altered in in vitro matured testicular tissues of prepubertal mice
Source: eLife. 2023 Dec 14;12:RP85562. doi: 10.7554/eLife.85562 (PMC10721218; doi:10.7554/eLife.85562)
Supplement: Figure 6—figure supplement 2—source data 1. [file elife-85562-fig6-figsupp2-data1.xlsx]

## Sheet: Fig S6-2
Samples	relative mRNA levels of Srd5a1 (normalized to Hsd3b1)	relative mRNA levels of Sult1e1 (normalized to Hsd3b1)	relative mRNA levels of Insl3 (normalized to Hsd3b1)	relative mRNA levels of Igf1 (normalized to Gapdh and Actb)	relative mRNA levels of Dhh (normalized to Gapdh and Actb)	relative mRNA levels of Abp (normalized to Gapdh and Actb)	relative mRNA levels of Hsd17b2 (normalized to Hsd3b1)
D30 FT_1	0.00316701	0.0124573	0.0146633	0.446456	0.301921	1.1875	0.0501956
D30 FT_2	0.00791868	0.0334346	0.00277698	0.64481	0.286715	1.2405	0.0133588
D30 FT_3	0.0396695	0.0118564	0.0141309	0.593974	0.745263	4.34962	0.0150343
D30 FT_4	0.0776409	0.0152154	0.0265466	0.595722	1.39584	2.45643	0.0134638
D30 FT + hCG_1	0.416753	0.234139	0.0422229	0.281575	0.908907	3.10433	0.00772767
D30 FT + hCG_2	0.306587	0.389406	0.0460044	0.321167	0.967173	3.17902	0.0154927
D30 FT + hCG_3	0.325112	0.267759	0.0357463	0.445537	0.768734	2.95136	0.0134466
D30 FT + hCG_4	0.541734	0.0881964	0.446148	0.148842	3.17557	0	0.0408155
36 dpp_1	1.16679	0.587922	1.44368	1.19497	1.88544	1.27917	0.645952
36 dpp_2	0.818466	2.29954	1.50916	0.653244	0.469411	0.763889	2.92177
36 dpp_3	1.43867	0.96585	0.868589	1.07827	1.19501	1.06326	0.891087
36 dpp_4	0.732591	0.779883	0.534319	1.19934	0.954109	0.967266	0.624739
