# Supplementary material for: Steroidogenesis and androgen/estrogen signaling pathways are altered in in vitro matured testicular tissues of prepubertal mice
Source: eLife. 2023 Dec 14;12:RP85562. doi: 10.7554/eLife.85562 (PMC10721218; doi:10.7554/eLife.85562)
Supplement: Figure 6—source data 1. [file elife-85562-fig6-data1.xlsx]

## Sheet: Fig 6
Samples	Androstenedione intratesticular concentration (pg/µg protein) (Fig 6A)	Testosterone intratesticular concentration (pg/µg protein) (Fig 6B)	relative mRNA levels of Lhcgr (normalized to Hsd3b1)	relative mRNA levels of Star (normalized to Hsd3b1)	relative mRNA levels of Cyp11a1 (normalized to Hsd3b1)	relative mRNA levels of Hsd3b1 (normalized to Gapdh and Actb)	relative mRNA levels of Cyp17a1 (normalized to Hsd3b1)	relative mRNA levels of Hsd17b3 (normalized to Hsd3b1)	relative mRNA levels of Cyp19a1 (normalized to Gapdh and Actb)	relative mRNA levels of Ar (normalized to Gapdh and Actb)	relative mRNA levels of Rhox5 (normalized to Gapdh and Actb)	relative mRNA levels of Septin12 (normalized to Gapdh and Actb)	relative mRNA levels of Eppin (normalized to Gapdh and Actb)	relative mRNA levels of Esr1 (normalized to Gapdh and Actb)	relative mRNA levels of Esr2 (normalized to Gapdh and Actb)	relative mRNA levels of Gper1 (normalized to Gapdh and Actb)	relative mRNA levels of Faah (normalized to Gapdh and Actb)
D30 FT_1	2.2247	1.36213	0.264072	0.354863	0.0327413	0.348944	0.429239	2,11567018*	0	1.46511	0.0345037	0.712737	21.4089	0.539789	0	0	0.16373
D30 FT_2	1.90547	0.90162	0.482501	0.621557	0.0841892	0.705167	0.10685	0.342135	0	2.42537	0.0553876	0.670671	17.6688	0.0874681	0	0	0.0621624
D30 FT_3	2.03229	0.542731	0.224323	0.421334	0.0362084	0.585768	0.0378022	0.280433	0	1.80431	0.0318325	0.307124	20.9833	0.104159	0	0	0.12224
D30 FT_4	1.62171	0.716809	0.212788	1.21296	0.028509	0.499965	0.0409633	0.520971	0	2.18051	0.0482475	0.301329	16.0245	0	0	0	0.284832
D30 FT + hCG_1	15.4708	39.5764	1.86762	0.974938	0.723927	0.688416	0.372828	0.0532458	0.0191709	1.39724	0.0145371	0.0610304	1.52291	0.367294	0.470383	1.04299	0.125766
D30 FT + hCG_2	12.7929	24.3079	1.61485	1.09019	0.417106	0.854316	0.352642	0.0472847	0.0140275	1.74707	0.00882466	0.0597508	1.90444	0.448032	1.06897	0.59868	0.1218
D30 FT + hCG_3	9.93027	21.1442	2.28558	0.814728	0.636778	1.07369	0.397667	0.0366681	0.0193301	1.60363	0.0182439	0.0384511	1.31014	0.536562	0.200459	0.464847	0.104627
D30 FT + hCG_4	14.9306	30.1497	2.11576	1.08874	0.431174	1.17807	0.464737	0.0482557	0.00990003	2.27978	0.0226062	0.0419935	1.45574	0.59326	0.874674	0.672192	0.13757
D30 CSF_1	3.01615	2.562	0.651075	0.21287	0.0249248	0.64193	0.12083	0.145402	0.0434211	1.25721	0.0166495	0.33559	13.6022	0.374947	0	0	0.102792
D30 CSF_2	2.77463	2.34484	1.40758	0.128239	0.0663911	0.518188	0.110033	0.0740078	0.094923	1.0751	0.0079851	0.116513	2.63389	0.448944	0.50698	1.36444	0.130211
D30 CSF_3	15.3846	3.05758	2.66372	0.830369	0.0474247	0.477359	0.0193392	0.0281218	0.025842	1.46748	0.0143517	0.0939936	1.45094	0.304276	0.359306	1.29015	0.189856
D30 CSF_4	6.73543	1.98835	0.352168	0.31854	0.177933	0.52179	0.0243099	0.0257272	0.0338015	1.52801	0.0101198	0.101857	1.68426	0.335616	0.39462	2.09657	0.190965
D30 CSF_5	N/A	N/A	0.377645	0.365783	0.179772	0.496738	N/A	0.028913	N/A	N/A	N/A	N/A	N/A	N/A	N/A	N/A	N/A
D30 CSF + hCG_1	12.0572	12.7669	1.30137	0.647819	0.115307	0.443261	0.503131	0.125621	0.0220796	0.562706	0.00411383	0.0911687	2.76893	0.379743	0	0.903319	0.0584458
D30 CSF + hCG_2	9.19034	12.2958	1.17706	0.474075	0.0676245	0.537472	0.384191	0.131659	0.037137	0.634305	0.00603705	0.115444	4.41576	0.352677	0	0.672298	0.0841504
D30 CSF + hCG_3	13.4511	12.9036	0.817095	0.420543	0.0634645	0.724045	0.225616	0.127674	0	0.625741	0.00893529	0.0674257	4.16525	0.410804	0	3.9728	0.0596626
D30 CSF + hCG_4	9.96513	21.4935	1.56206	1.31221	1.03329	0.844423	0.309505	0.0266611	0.0240697	1.65851	0.0146258	0.0302513	1.47981	0.404516	0.0969233	0.835833	0.0943989
D30 CSF + hCG_5	N/A	N/A	1.20621	1.51282	1.0264	0.690287	0.337415	0.0332936	0.0110192	1.65118	0.00877028	0.0293084	1.06704	0.384689	0.161932	0.718914	0.114577
36 dpp_1	7.24557	5.83713	0.755024	0.816479	1.00094	0.880378	0.767828	0.799709	1.18562	0.868486	1.01852	0.952176	1.02927	0.950084	1.22117	1.10774	0.802709
36 dpp_2	12.6856	11.2245	0.808673	0.927472	0.886645	0.605438	1.03954	1.02901	1.08513	1.57107	1.37473	1.00733	1.1787	1.68208	1.14116	1.10774	1.70124
36 dpp_3	3.228	1.35057	1.30875	1.35072	1.05776	1.37068	1.19028	1.18349	1.11042	0.870411	0.922618	1.00103	0.972964	0.798472	0.853523	1.37113	0.9181
36 dpp_4	2.89926	1.24759	1.25645	1.34814	1.11816	1.16313	1.07263	1.03274	1.03216	1.0402	0.91506	1.02365	0.854568	0.98696	1.01849	0.812983	0.964038
* exclude value

## Sheet: Fig 6C-D
Androstenedione concentration in medium (ng/mL) (Fig 6C)
Days of culture	FT				CSF				FT + hCG				CSF + hCG				Basal medium
2	1.19	1.37	1.12	1.4	0.67	0.58	1.03	0.97									0
6	0.52	0.6	0.61	1.27	0.46	0.47	0.37	0.62									0
10	0.53	0.57	0.41	0.78	0.29	0.74	0.76	0.43									0
14	0.54	0.6	0.4	0.77	0.85	1.14	0.87	0.96									0
16	0.69	0.73	0.72	0.49	0.78	0.79	0.88	0.4	0.83	0.69	0.73	0.57	0.42	0.52	0.84	0.73	0
18	1.18	1.1	0.93	1.16	1.5	1.32	1.22	0.23	9.39	11.08	10.36	15.52	13.23	13.41	18.48	14.12	0
22	1.8	1.79	1.65	1.46	2.08	1.8	1.58	0.3	77.34	48.54	62.54	123.57	36.85	51.34	67.4	44.4	0
26	1.84	2.52	2.14	1.96	2.78	2.19	1.44	0.65	91.93	65.53	69.32	115.02	25.26	45.11	48.96	52.94	0
30	2.47	4.02	3.76	2.89	3.11	2.88	2.15	0.95	92.04	83.93	89.19	132.06	42.45	57.99	61.62	56.52	0
Testosterone concentration in medium (ng/mL) (Fig 6D)
Days of culture	FT				CSF				FT + hCG				CSF + hCG				Basal medium
2	14.76	18.75	16.43	16.52	13.31	11.2	16.79	18.64									0.07	0.17	0
6	9.41	10.96	11.35	19.96	7.95	9.07	6.46	12.26									0.07	0.17	0
10	8.18	7.67	6.42	9.62	3.95	10.34	7.86	6.45									0.07	0.17	0
14	6.07	5.76	4.56	6.12	6.95	10.26	9.8	6.95									0.07	0.17	0
16	7.96	5.5	3.85	6.51	7.04	4.6	7.48	2.85	12.82	8.19	8.93	7.8	3.1	3.01	5.66	5.87	0.07	0.17	0
18	7.58	6.29	5.69	7.05	7.6	10	7.83	1.55	61.5	54.24	57.62	41.43	14.84	19.98	23.01	25.84	0.07	0.17	0
22	8.8	6.78	7.02	7.21	7.27	8.48	7.22	1.27	178.32	137.64	220.97	185.31	30.44	56.5	63.01	70.43	0.07	0.17	0
26	6.88	6.47	6.77	11.98	7.52	7.91	5.03	2.36	213.92	152.04	194.47	226.82	27.15	56	60.52	113.15	0.07	0.17	0
30	33.74	9.64	11.92	16.3	8.71	9.54	7.51	2.29	262.65	217.13	258.53	341.78	61.36	94.09	100.73	152.13	0.07	0.17	0

## Sheet: Fig 6T-U
Percentage of the most advanced stage - Figure 6T
Samples	Spermatogonia				Leptotene / zygotene Spermatocytes I				Pachytene Spermatocytes I				Round spermatids				Elongated spermatids				Sertoli cells
D30	3.3	1.9	0	4.4	15	0	3.8	2.2	25	30.8	28.8	40	48.3	53.8	55.8	46.7	8.3	11.5	11.5	6.7	0	0	0	0
D30 + hCG	19.6	11.3	18.6	23.3	11.8	13.2	9.3	10	35.3	50.9	41.9	40	31.4	22.6	27.9	26.7	2	1.9	2.3	0	0	0	0	0
36 dpp	0	0	0	0	0	0	0	0	0	0	0	0	0	0	1.67	0	100	100	98.33	100	0	0	0	0
Samples	Sertoli cell number per seminiferous tubules (Figure 6U)
D30 FT_1	27.379
D30 FT_2	23.533
D30 FT_3	20.4
D30 FT_4	16.724
D30 FT_5	26.92
D30 FT_6	20.3
D30 FT_7	22.24
D30 FT_8	27.57
D30 FT + hCG_1	22.273
D30 FT + hCG_2	19.172
D30 FT + hCG_3	24.5
D30 FT + hCG_4	19.615
D30 FT + hCG_5	23.3
D30 FT + hCG_6	25.9
D30 FT + hCG_7	21.13
D30 FT + hCG_8	17.77
36 dpp_1	11.62
36 dpp_2	12.63
36 dpp_3	12.57
36 dpp_4	8.1
